# Supplementary material for: Whole genome sequencing for revealing the point mutations of SARS-CoV-2 genome in Bangladeshi isolates and their structural effects on viral proteins
Source: Royal Society of Chemistry journal article supplement (doi:10.1039/d1ra05327b), 2021-01-01
Supplement: d1ra05327b1.pdf [file d1ra05327b1.pdf]

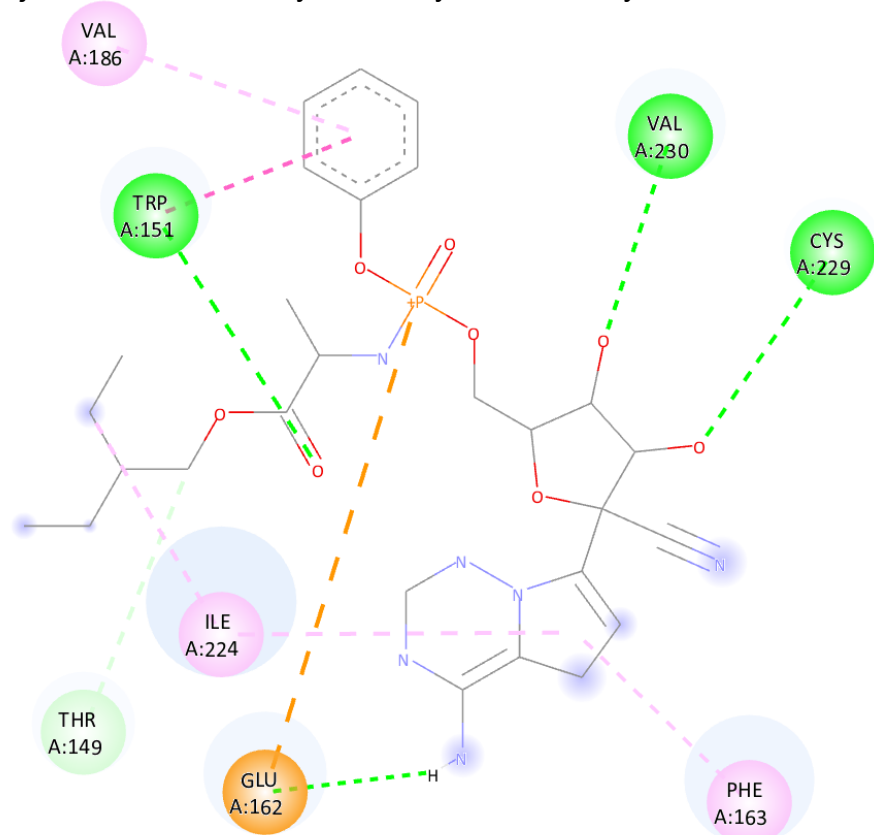

Wild type I120\_Remdesivir (NSP1)

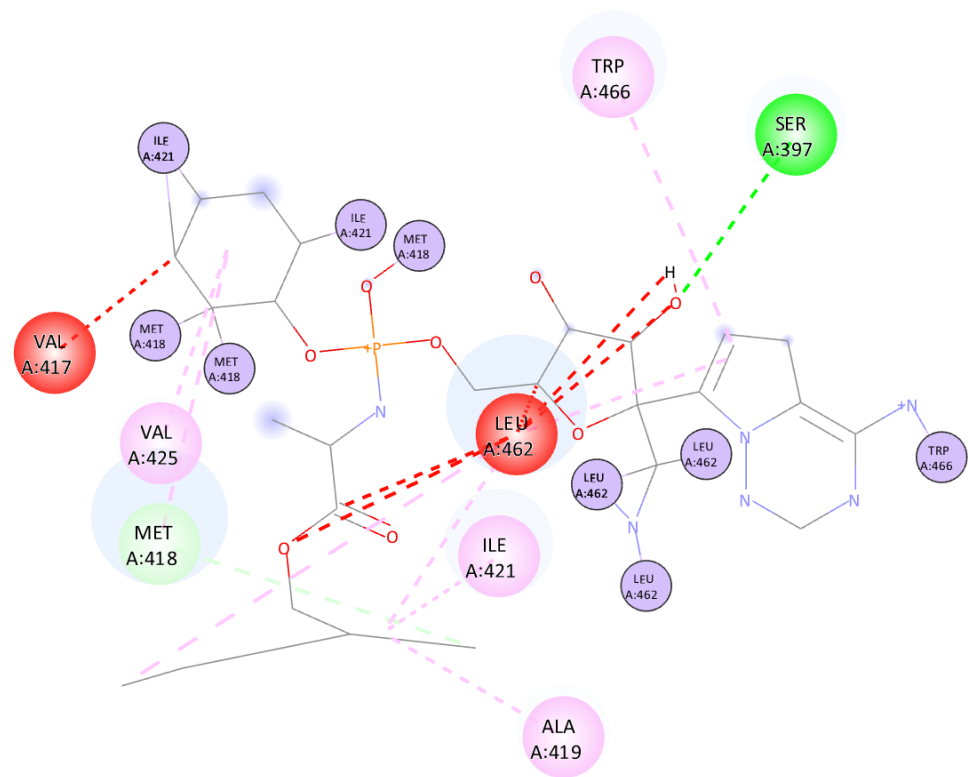

Mutant F120\_Remdesivir (NSP1)

# Supplementary Figure 1: Drug-binding interactions

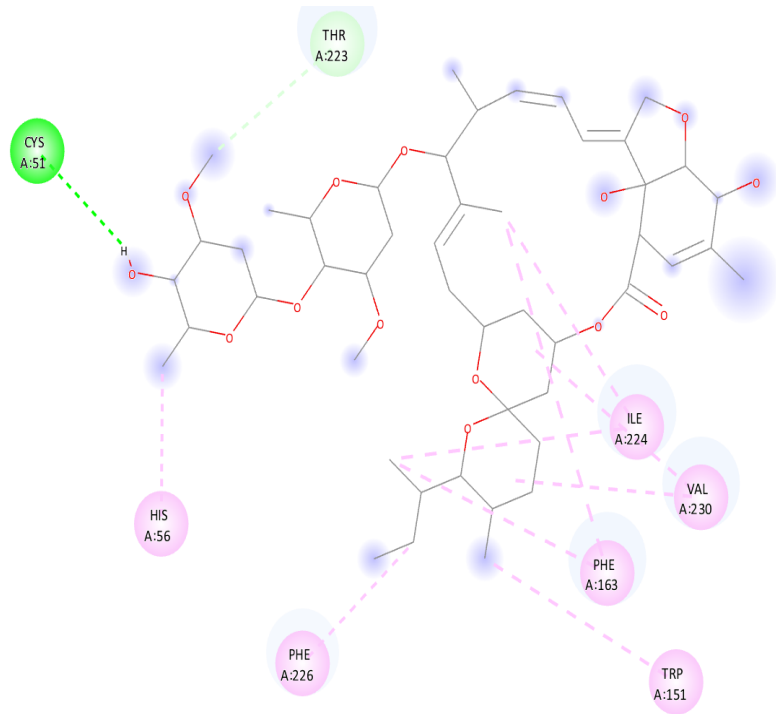

Wildtype I120\_Ivermectin (NSP1)

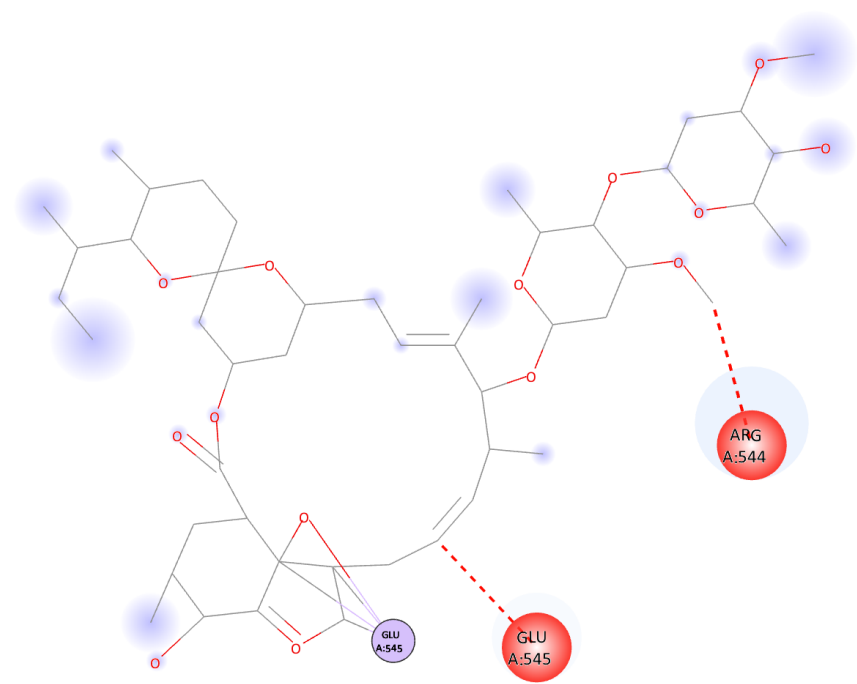

Mutant F120\_Ivermectin( NSP1)

# Supplementary Figure 1: Drug-binding interactions

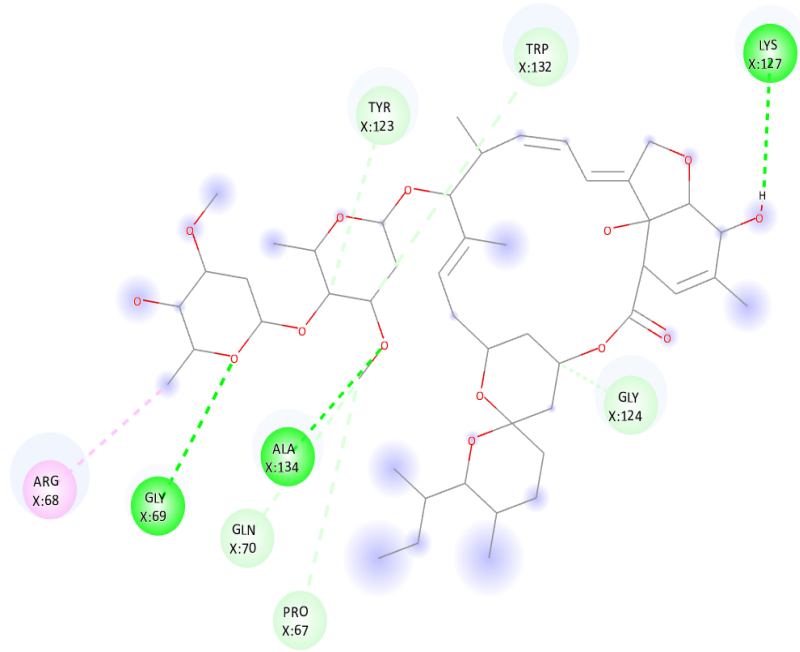

Wild type 202\_203\_204\_Ivermectin (N)

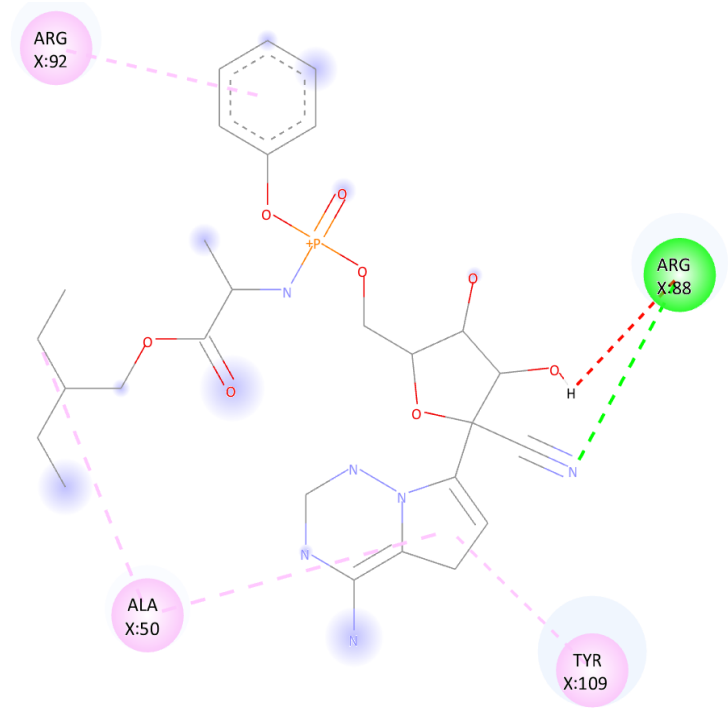

Wild type 202\_203\_204\_Remdesivir (N)

# Supplementary Figure 1: Drug-binding interactions

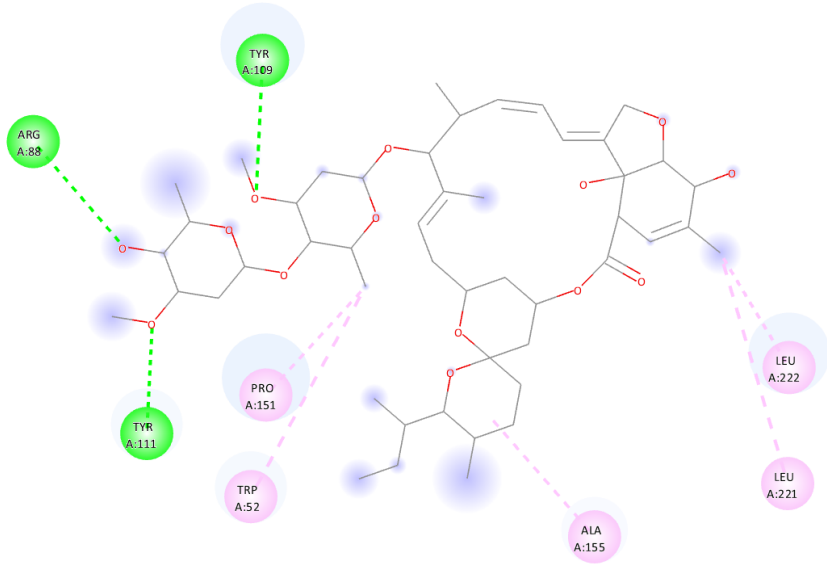

Mutant\_203\_Ivermectin (N)

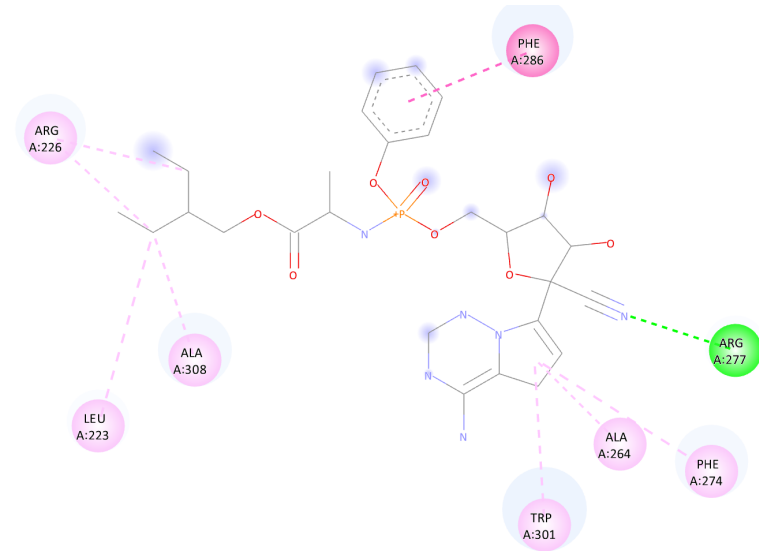

Mutant\_203\_Remdesivir (N)

# Supplementary Figure 1: Drug-binding interactions

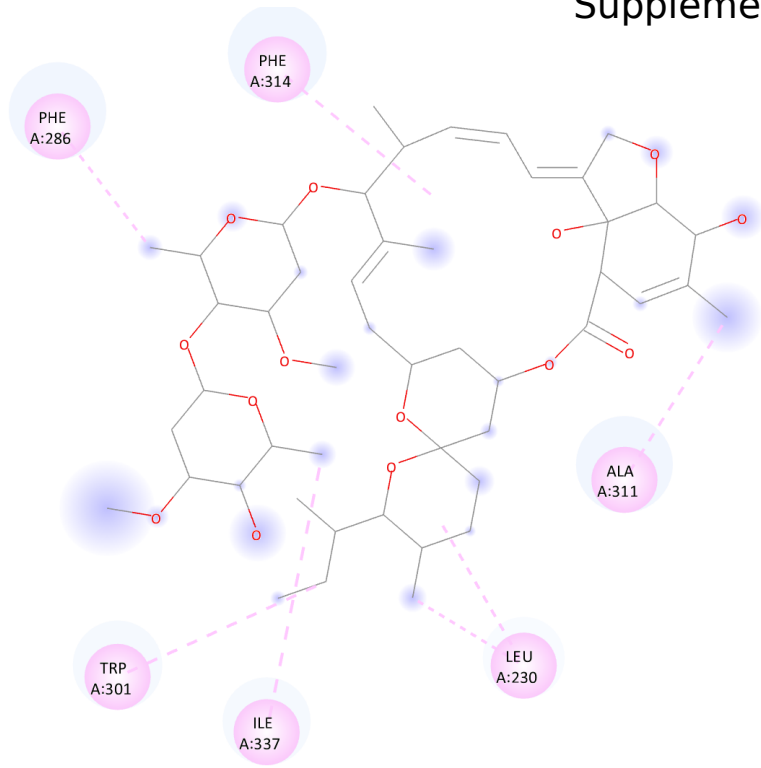

Mutant\_204\_Ivermectin (N)

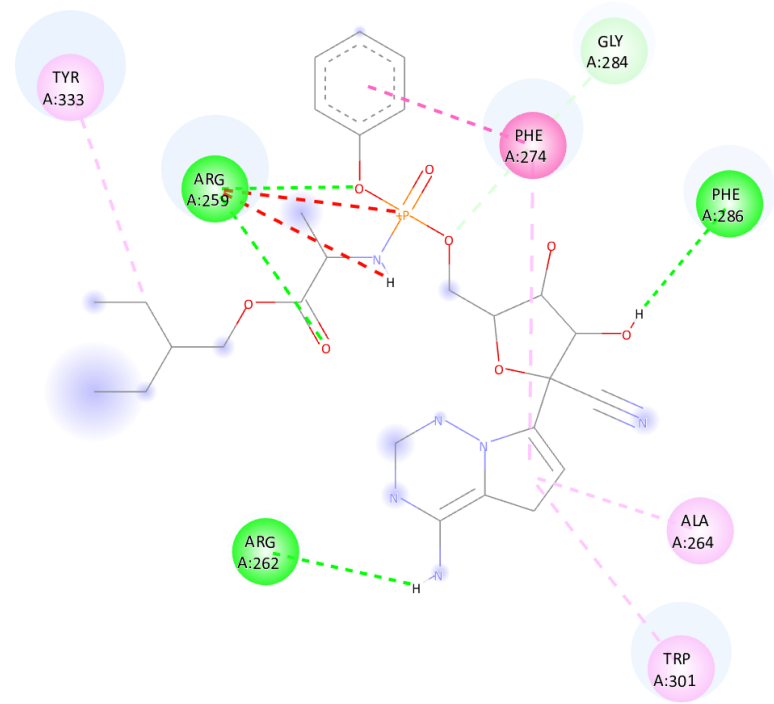

Mutant\_204\_Remdesivir (N)

# Supplementary Figure 1: Drug-binding interactions

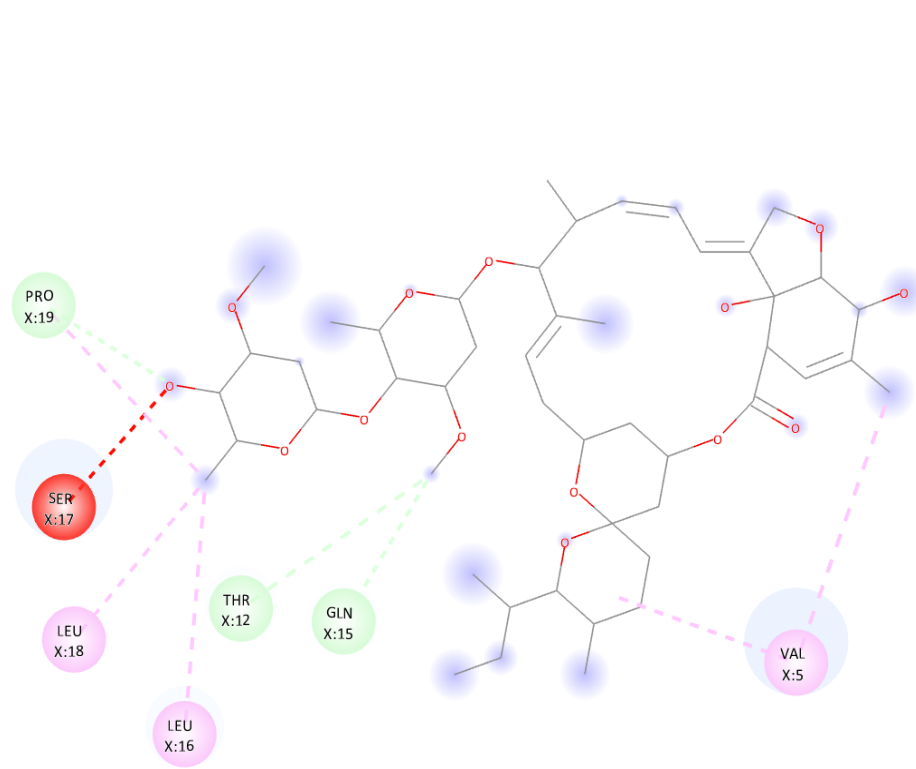

Wild type Valine121\_Ivermectin (NSP1)

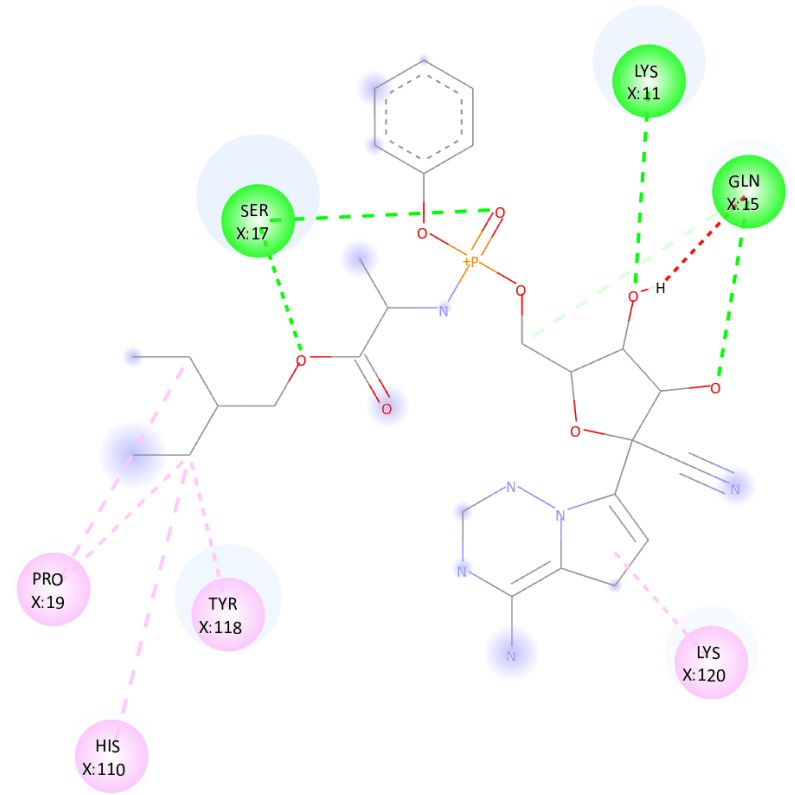

Wild type Valine\_121\_Remdesivir (NSP1)

# Supplementary Figure 1: Drug-binding interactions

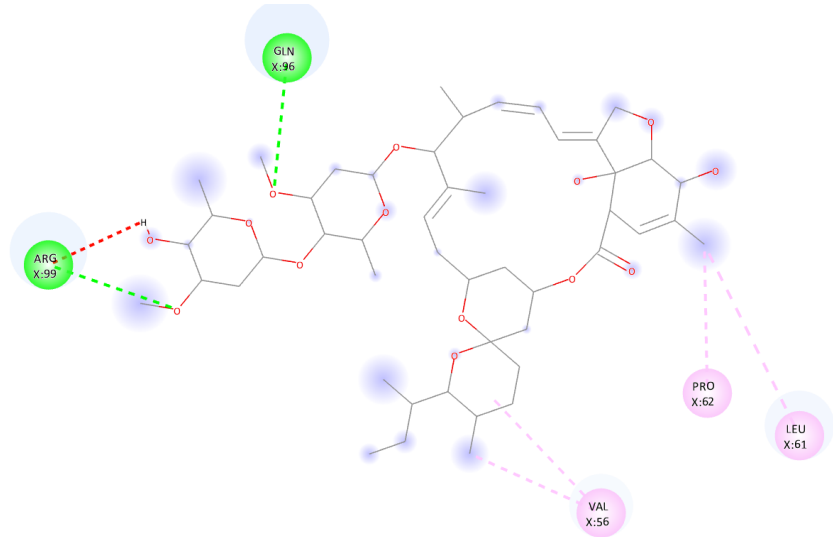

Wild type L122\_\_Ivermectin (NSP1)

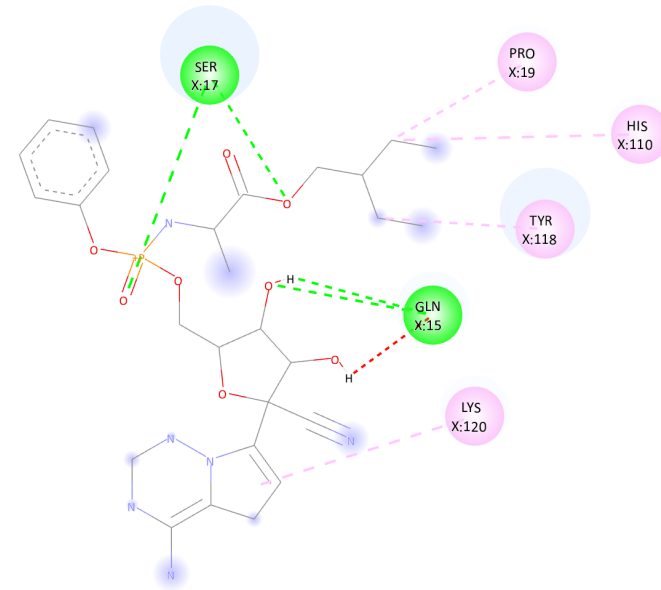

Wild type L122\_Remdesivir (NSP1)

# Supplementary Figure 1: Drug-binding interactions

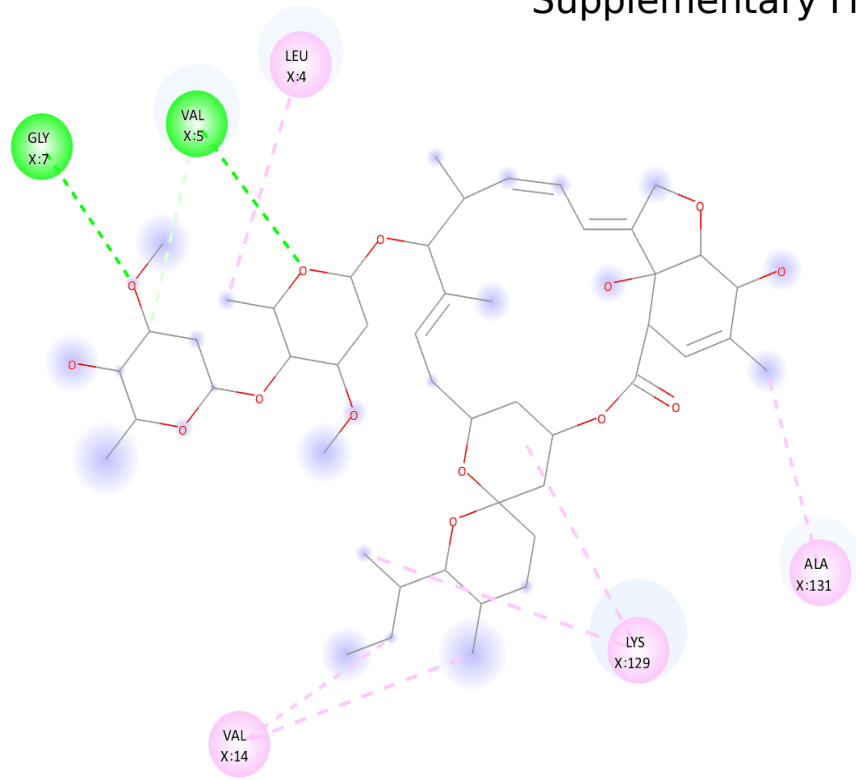

Mutant Ile122\_Ivermectin (NSP1)

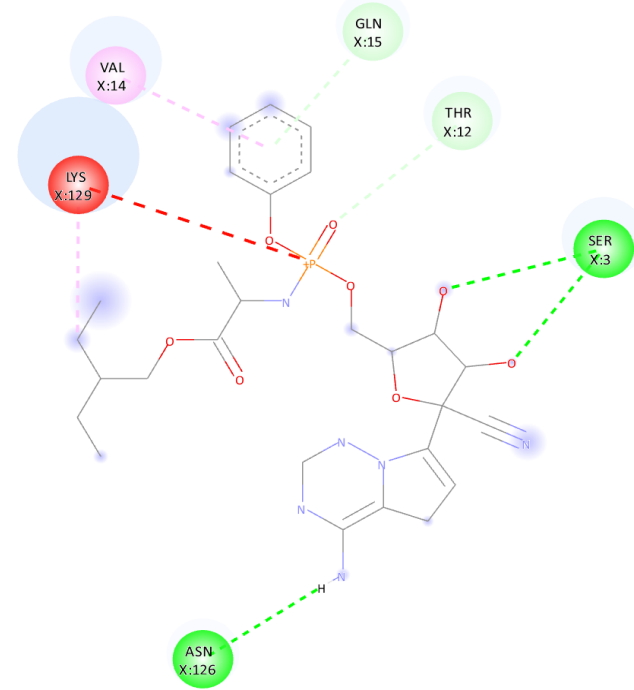

Mutant Ile122\_Remdesivir (NSP1)



# Supplementary Figure 1: Drug-binding interactions

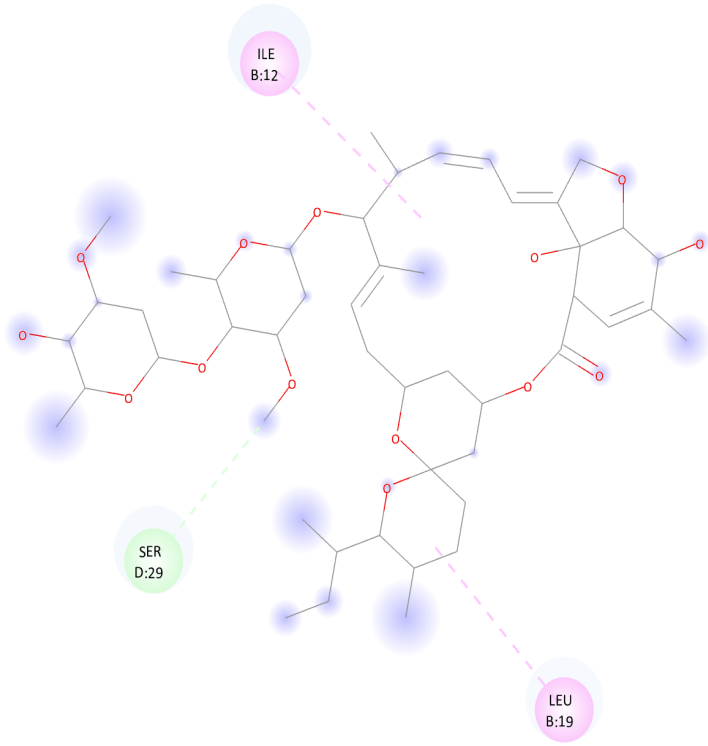

Wild ASP614\_Ivermectin (S)

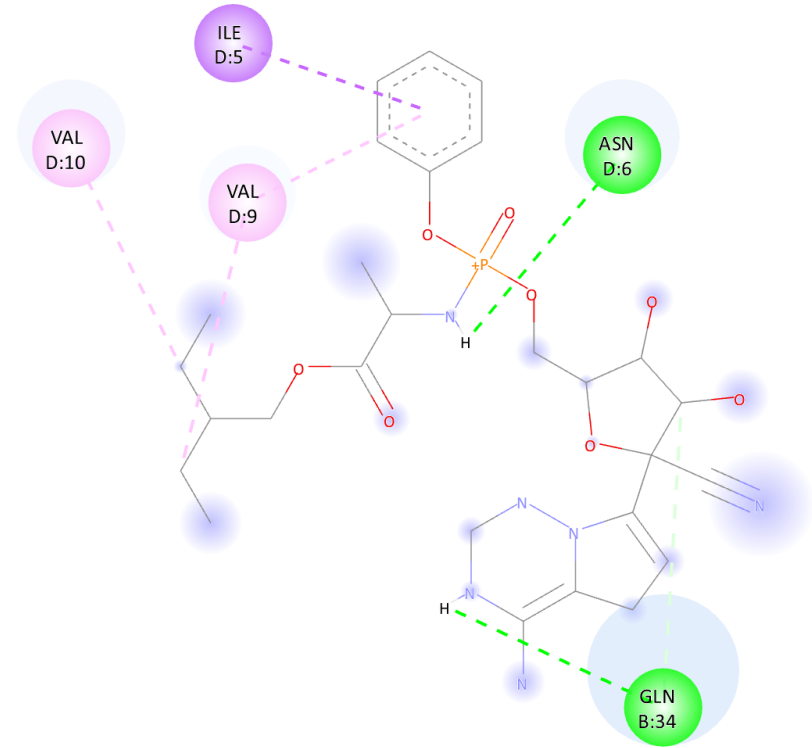

Wild ASP614\_Remdesivir (S)

# Supplementary Figure 1: Drug-binding interactions

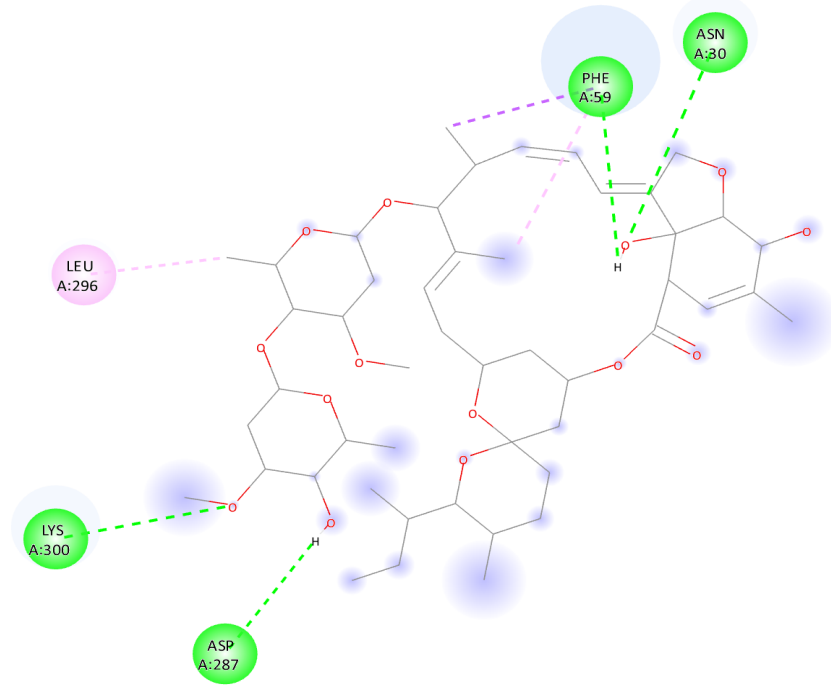

Mutant D614G\_Ivermectin (S)

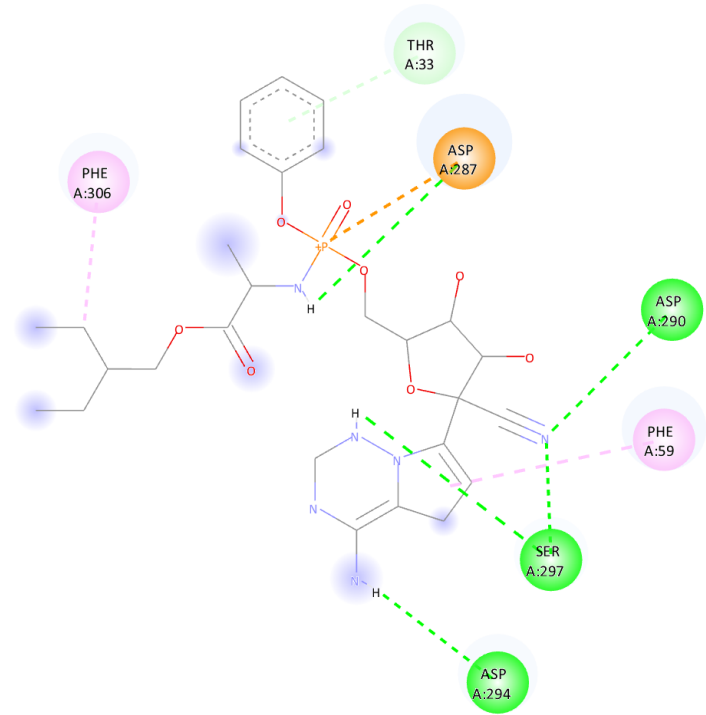

Mutant D614G\_Remdesivir (S)

# Supplementary Figure 1: Drug-binding interactions

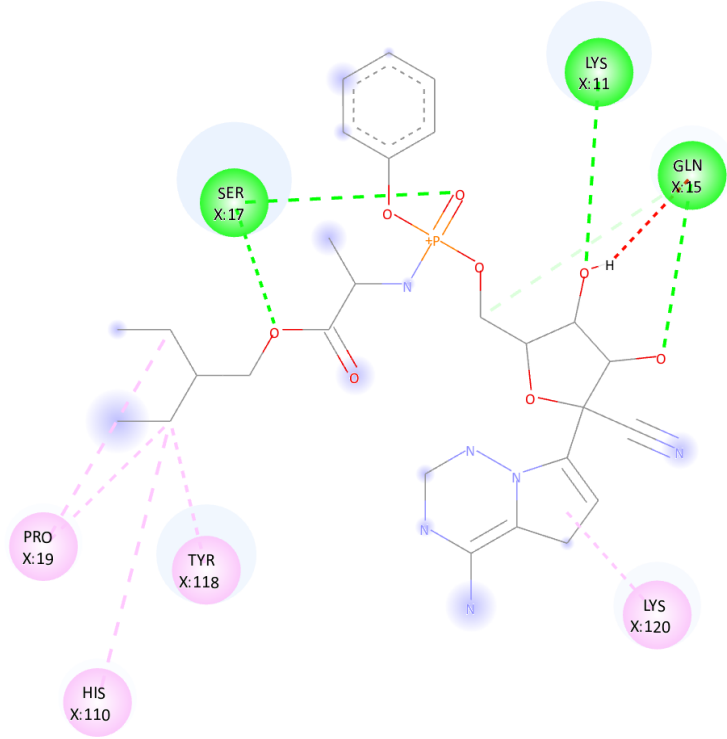

Wild type V\_121\_Remdesivir (NSP1)

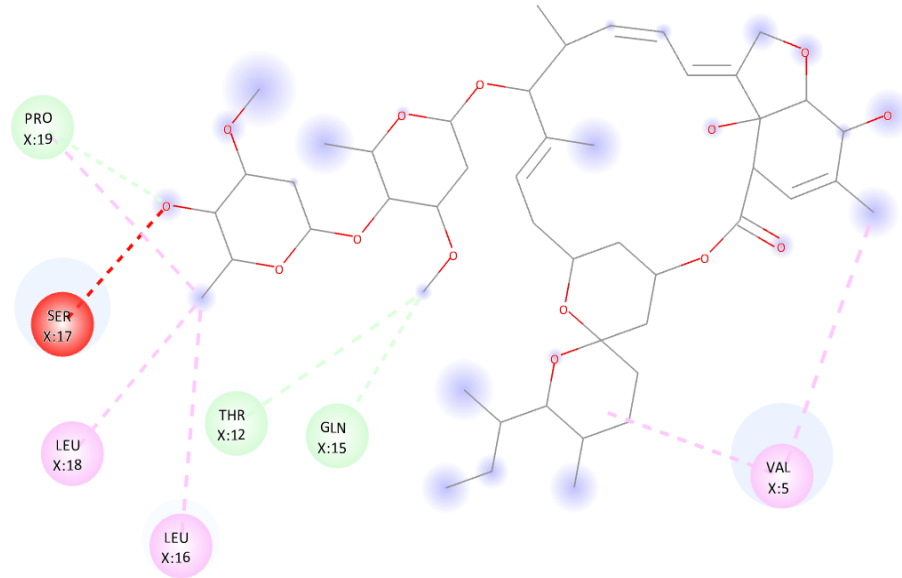

Wild type V\_121\_Ivermectin (NSP1)

# Supplementary Figure 1: Drug-binding interactions

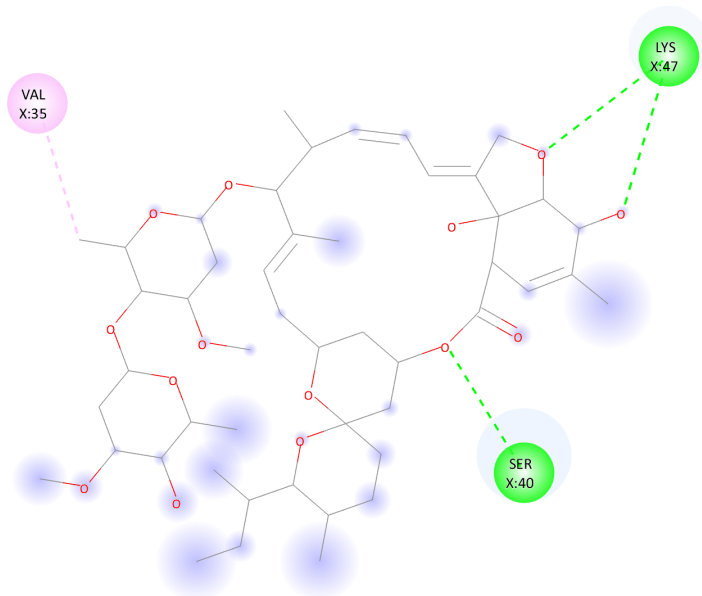

Mutant D\_121\_Ivermectin (NSP1)

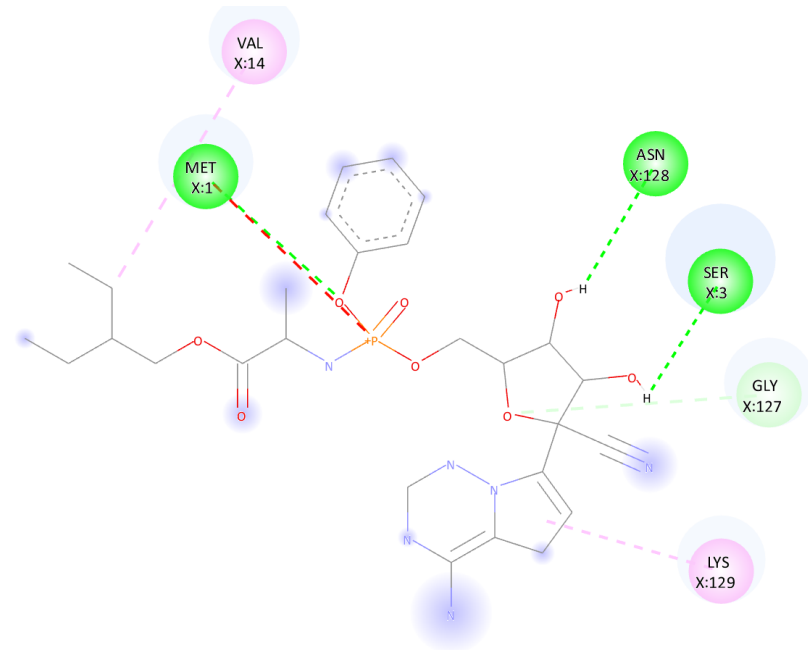

Mutant D\_121\_Remdesivir (NSP1)

# Supplementary Figure 1: Drug-binding interactions

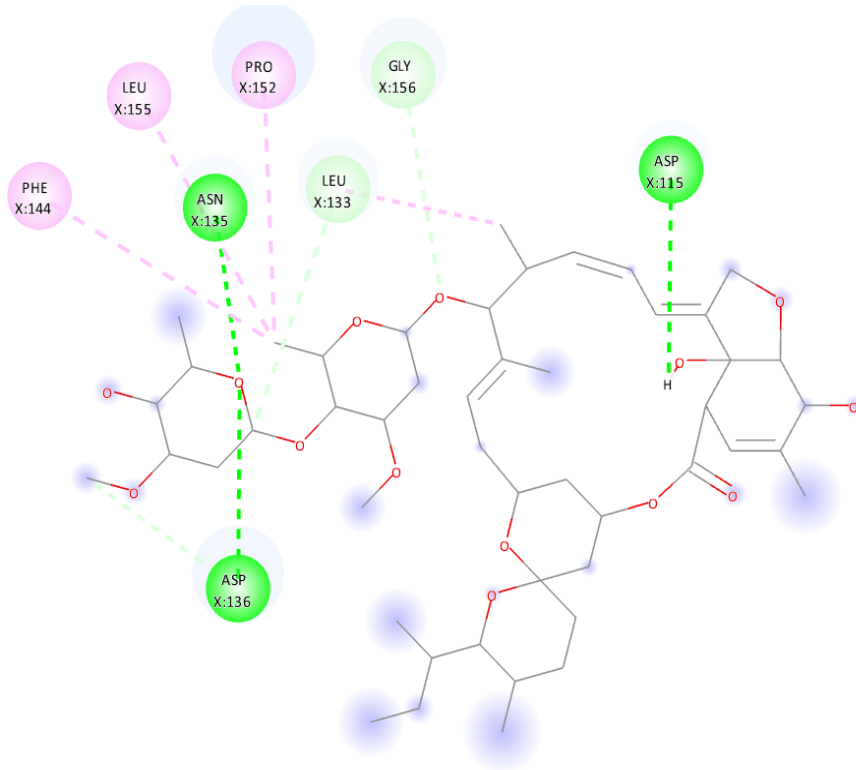

Wild type\_843, 889\_Ivermectin (NSP3)

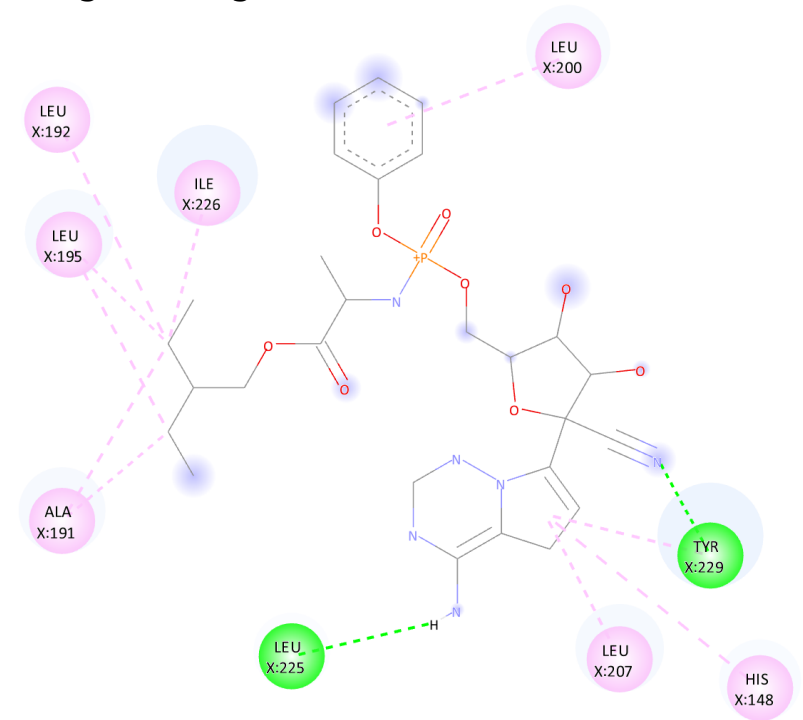

Wild type\_843, 889\_Remdesivir (NSP3)

# Supplementary Figure 1: Drug-binding interactions

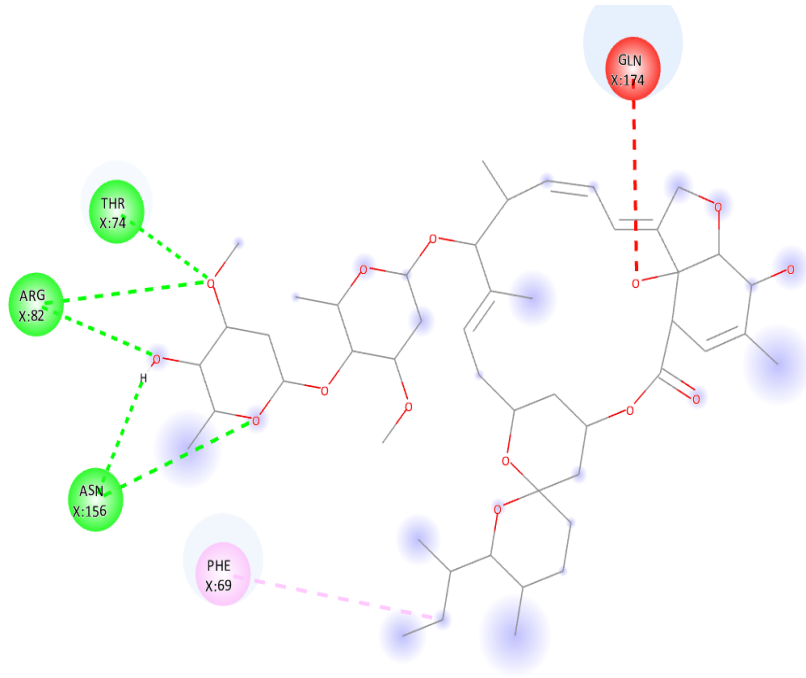

Mutant V843F\_Ivermectin (NSP3)

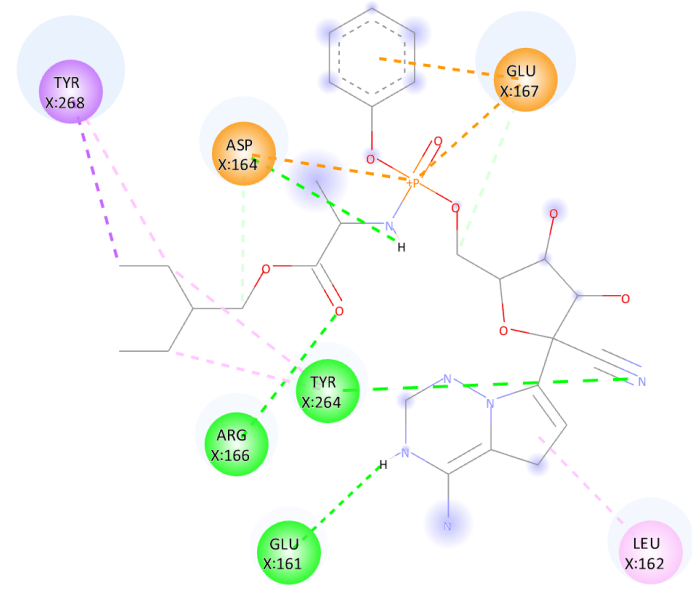

Mutant V843F\_Remdesivir (NSP3)

# Supplementary Figure 1: Drug-binding interactions

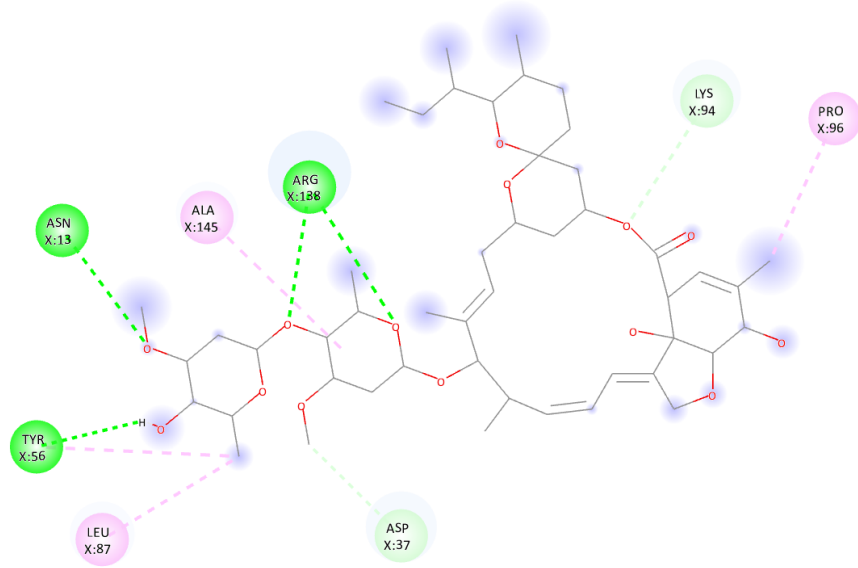

Mutant type A889V Ivermectin (NSP3)

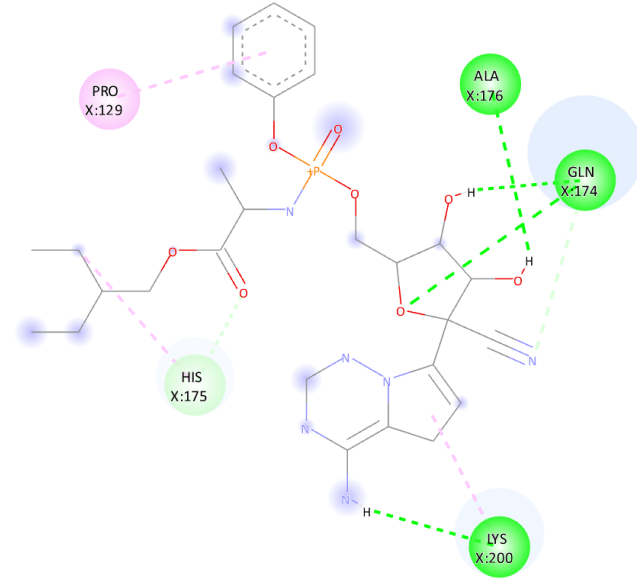

Mutant type A889V Remdesivir (NSP3)

# Supplementary Figure 2: Results of Molecular Dynamic

RMSD Simulation  
Backbone after lsq fit to Backbone

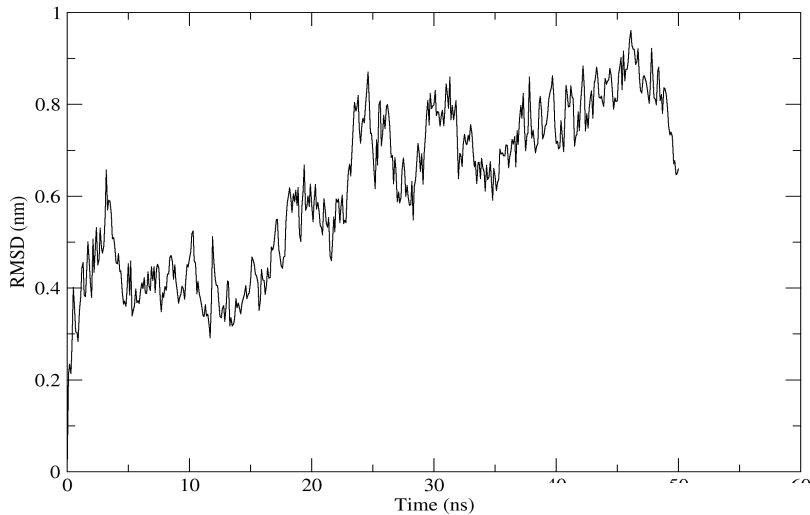

NSP3 wild

RMSD  
Backbone after lsq fit to Backbone

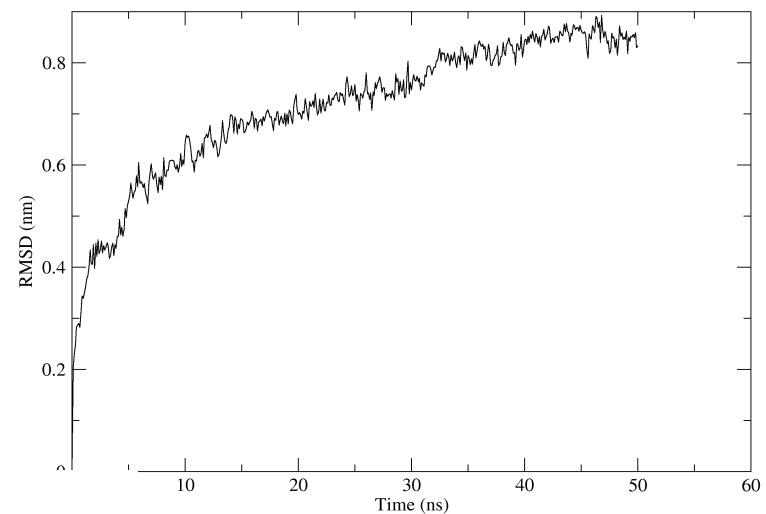

NSP3 V843F

RMSD  
Backbone after lsq fit to Backbone

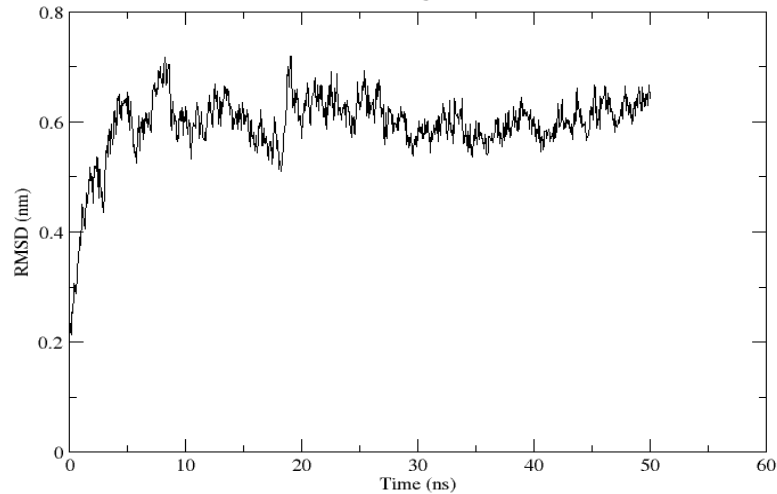

NSP3 A889V



# Supplementary Figure 2: Results of Molecular Dynamic Simulation

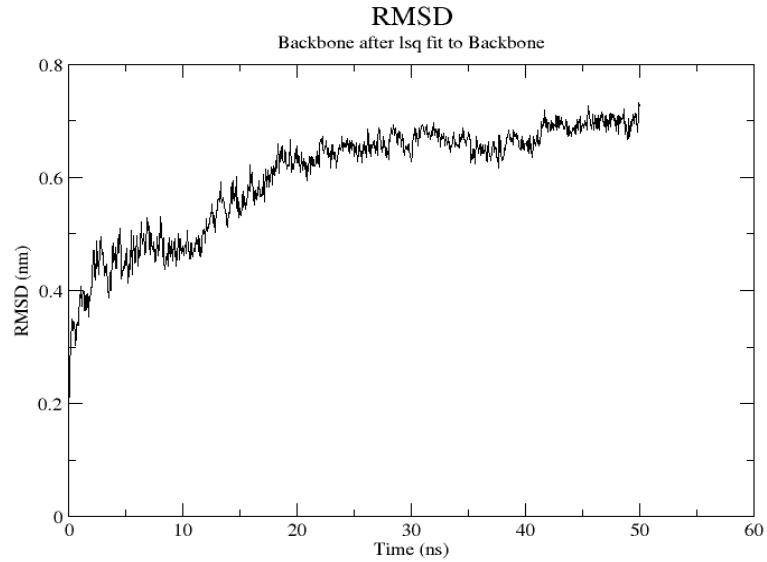

NSP1 wild

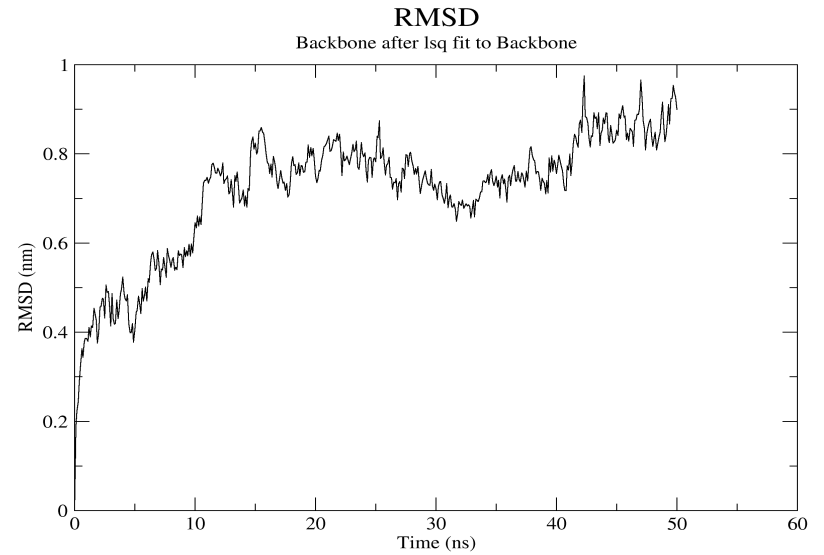

NSP1 V121D

# Supplementary Figure 2: Results of Molecular Dynamic

## RMS fluctuation

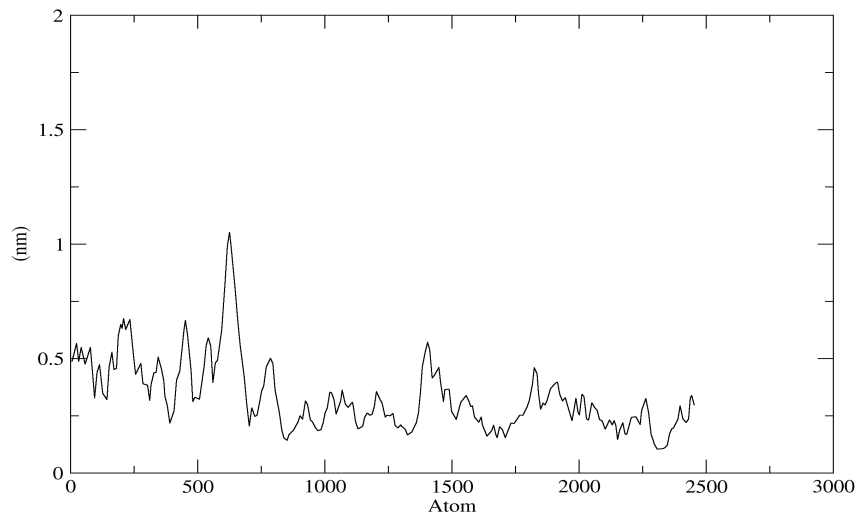

## RMS fluctuation

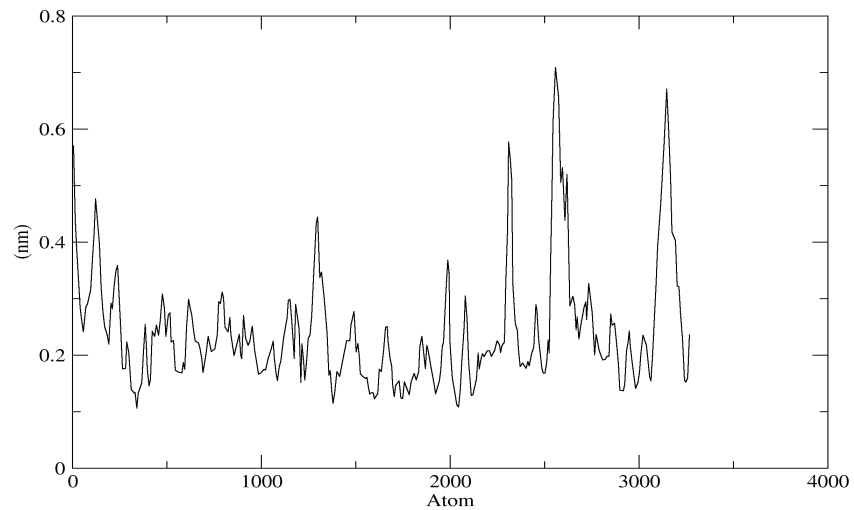

## NSP3 wild

## RMS fluctuation

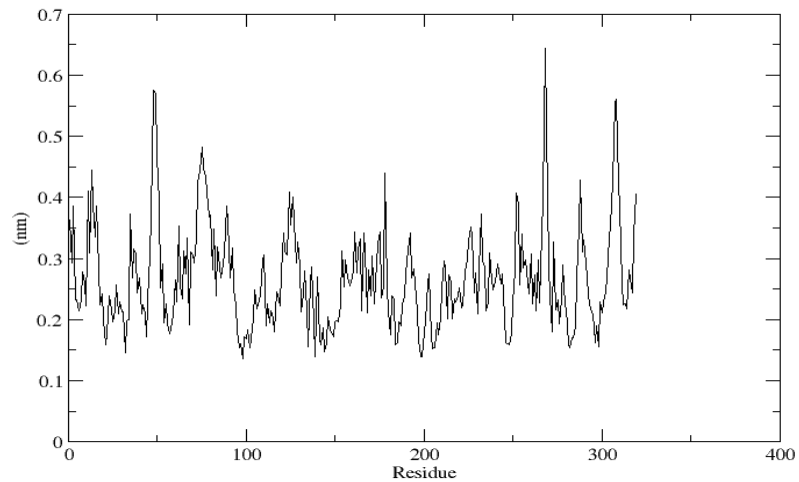

## NSP3 V843F

## NSP3 A889V

# Supplementary Figure 2: Results of Molecular Dynamic Simulation

## RMS fluctuation

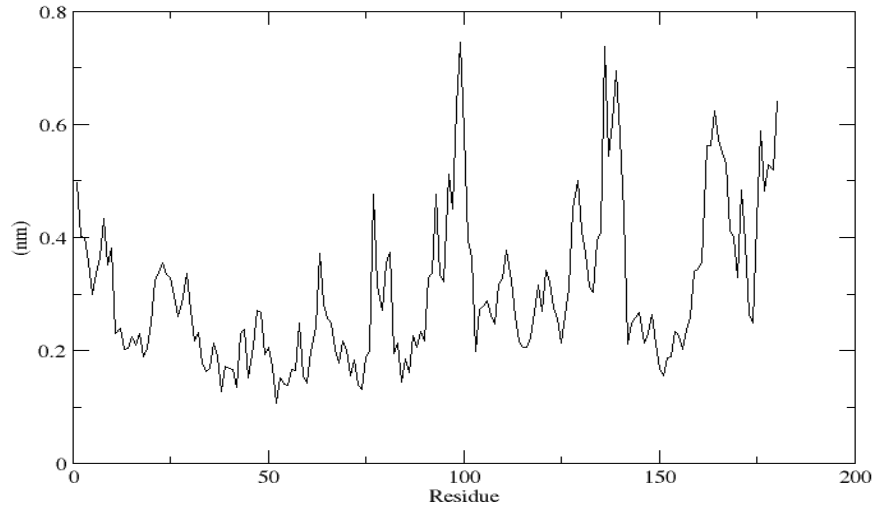

## NSP1 wild

## RMS fluctuation

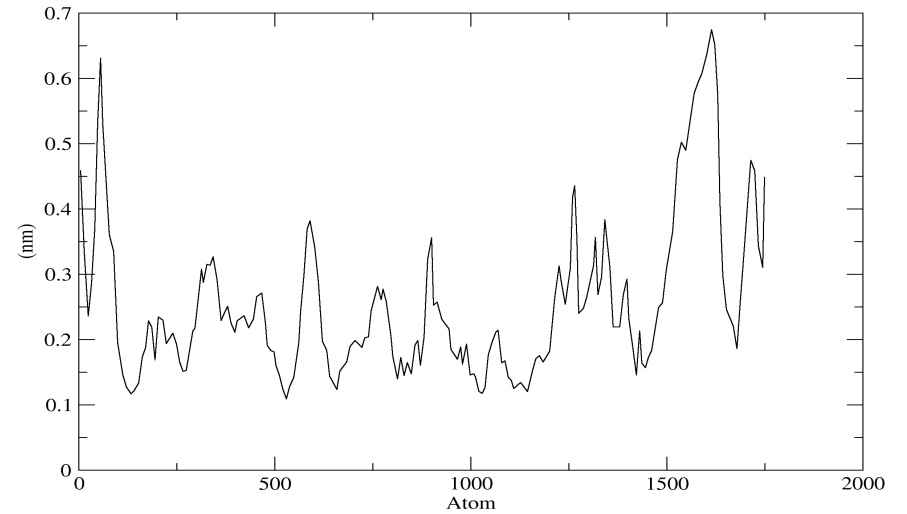

## NSP1 V121D

# Supplementary Figure 2: Results of Molecular Dynamic Simulation

Radius of gyration (total and around axes)

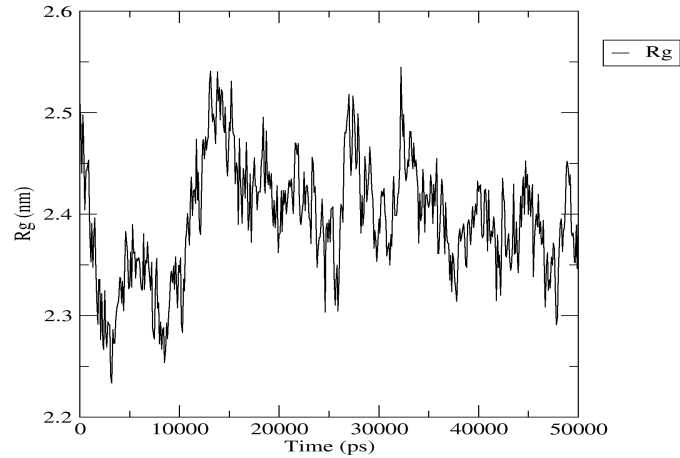

NSP3 wild

Radius of gyration (total and around axes)

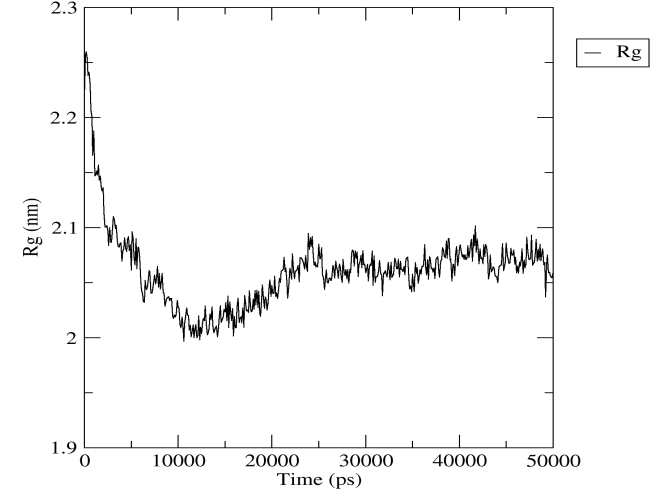

NSP3 V843F

f gyration (total and around axes)

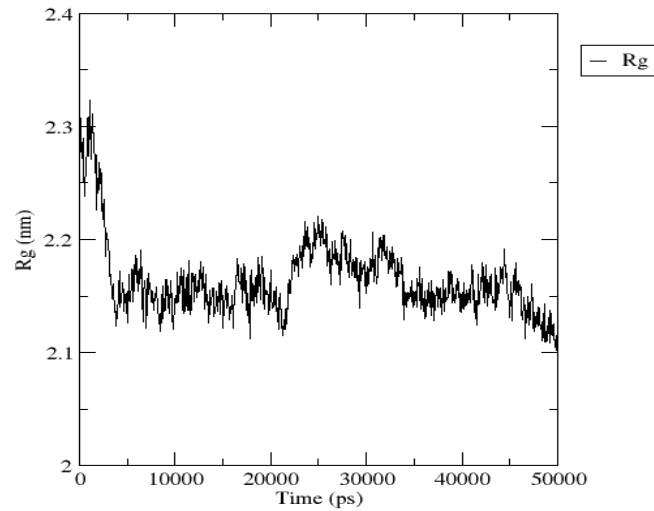

NSP3 A889V

# Supplementary Figure 2: Results of Molecular Dynamic Simulation

Radius of gyration (total and around axes)

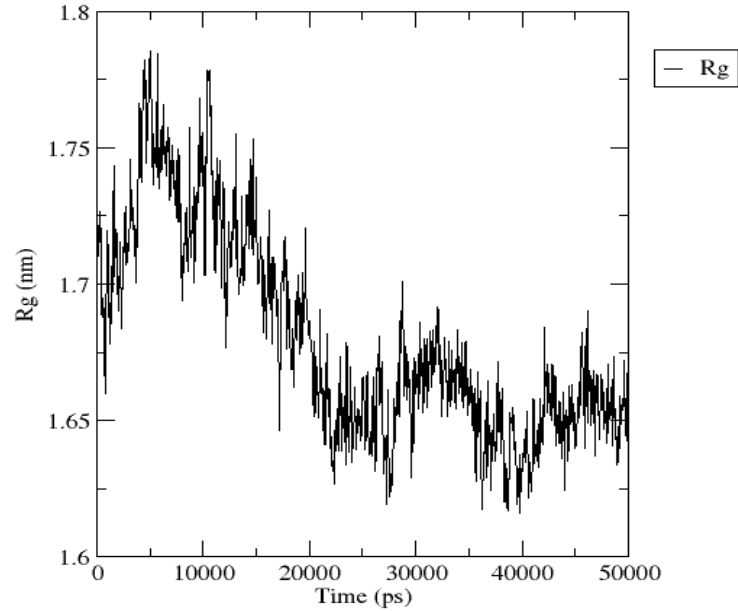

NSP1 wild V121

Radius of gyration (total and around axes)

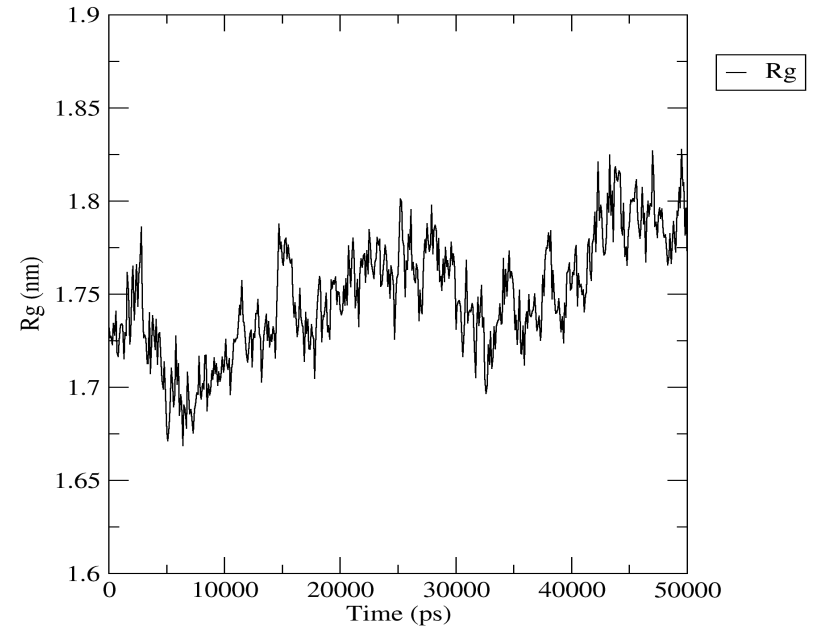

NSP1 V121D

# Supplementary Figure 2: Results of Molecular Dynamic Simulation

## Solvent Accessible Surface

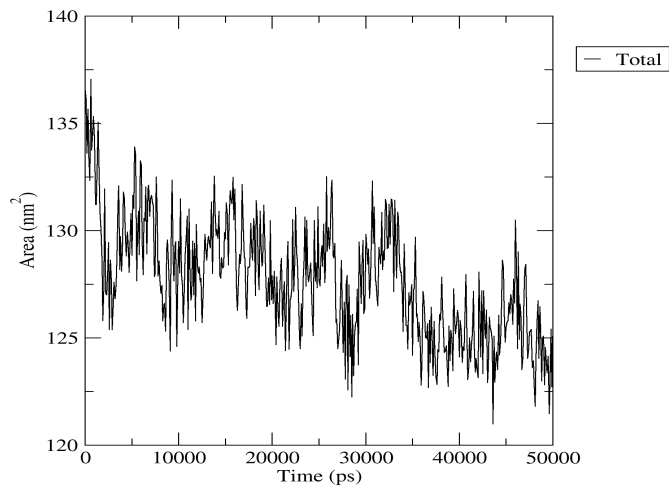

NSP3 wild

## Solvent Accessible Surface

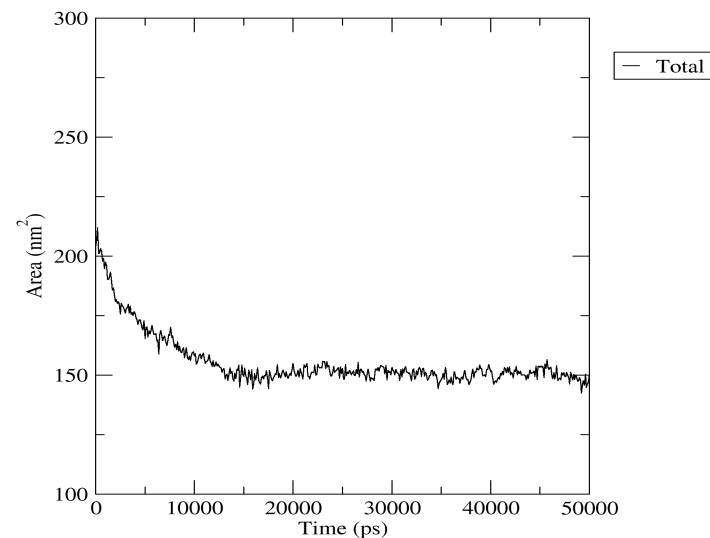

NSP3 V843F

## Solvent Accessible Surface

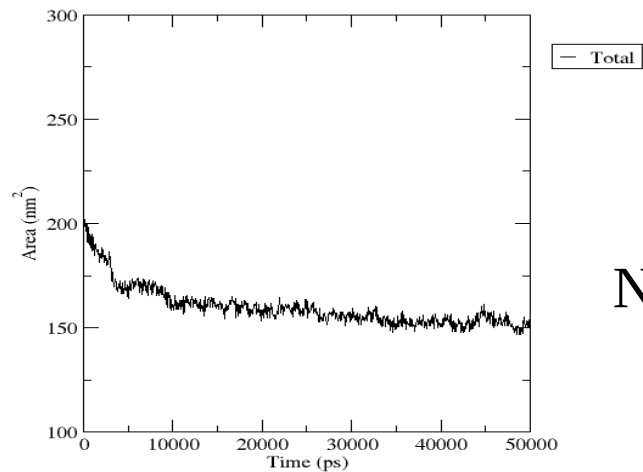

NSP3 A889V

# Supplementary Figure 2: Results of Molecular Dynamic Simulation

## Solvent Accessible Surface

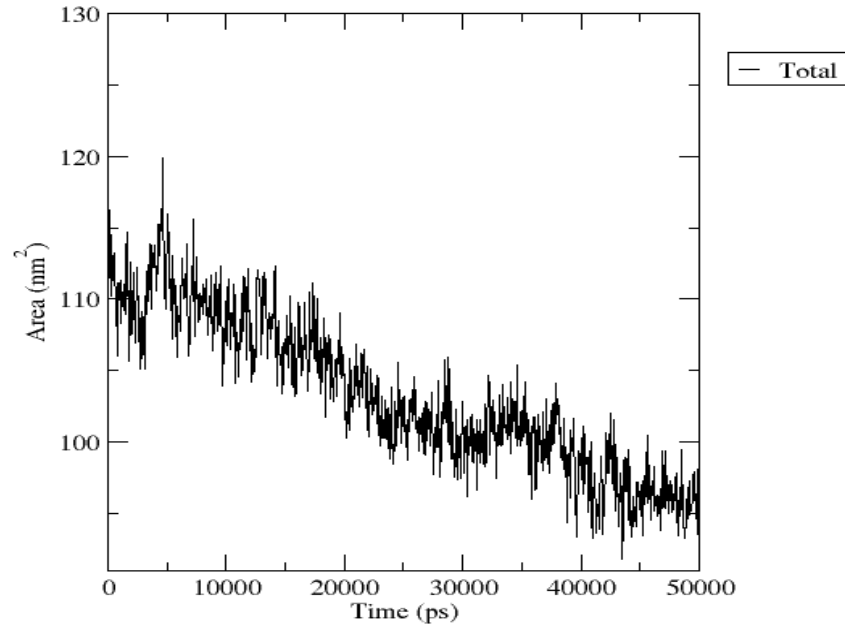

## NSP1 Wild V121

## Solvent Accessible Surface

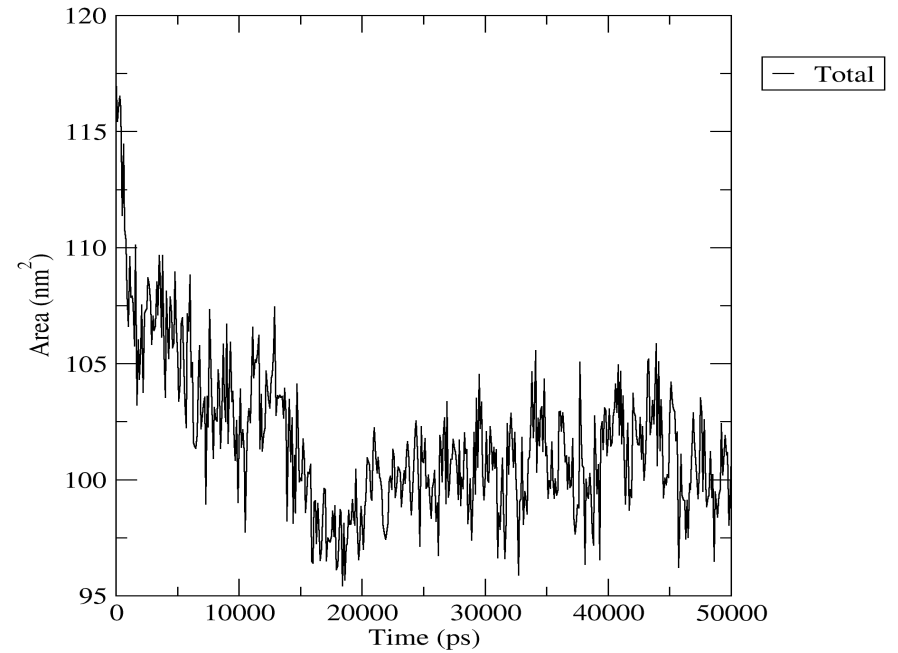

## NSP1 V121D
